# Supplementary material for: Comparing the Therapeutic Efficacies of Lung Cancer: Network Meta-Analysis Approaches
Source: MDPI journal article supplement (doi:10.3390/ijerph192114324), 2022-11-02
Supplement: s1 [file s1]

**Table S1.** Papers included in the updated meta-analysis

| No | Paper (Year)                  | Title                                                                                                                                                                           |
|----|-------------------------------|---------------------------------------------------------------------------------------------------------------------------------------------------------------------------------|
| 1  | Rittmeyer A et al (2016)      | Atezolizumab versus docetaxel in patients with previously treated non-small-cell lung cancer (OAK): a phase 3, open-label, multicentre randomised controlled trial              |
| 2  | Wu Y-Q et al (2011)           | The Clinical Investigation of Pemetrexed Plus Carboplatin as an Active and Tolerable Treatment Plan in Chinese Elderly Patients with Advanced Lung Adenocarcinoma               |
| 3  | Goss G.D. et al (2013)        | Gefitinib Versus Placebo in Completely Resected Non–Small-Cell Lung Cancer: Results of the NCIC CTG BR19 Study                                                                  |
| 4  | Kelly K. et al (2015)         | Adjuvant Erlotinib Versus Placebo in Patients with Stage IB-IIIA Non–Small-Cell Lung Cancer (RADIANT): A Randomized, Double-Blind, Phase III Trial                              |
| 5  | Luo X.-H. et al (2014)        | Effect of Erlotinib as Second-Line Therapy on Advanced Non-Small Cell Lung Cancer Following Failure of Chemotherapy                                                             |
| 6  | Chen Y.-M. et al (2015)       | Erlotinib or Chemotherapy in Second-Line or Later Treatment of Tumor EGFR Wild-Type Pulmonary Adenocarcinoma Patients                                                           |
| 7  | Gao J.-W. et al (2017)        | Erlotinib-based doublet targeted therapy versus erlotinib alone in previously treated advanced non-small-cell lung cancer: a meta-analysis from 24 randomized controlled trials |
| 8  | Zhuansun Y. et al (2017)      | Anti-PD-1/PD-L1 antibody versus conventional chemotherapy for previously-treated, advanced non-small-cell lung cancer: a metaanalysis of randomized controlled trials           |
| 9  | Hida T. et al (2017)          | Atezolizumab in Japanese Patients With Previously Treated Advanced NoneSmall-Cell Lung Cancer: A Subgroup Analysis of the Phase 3 OAK Study                                     |
| 10 | Fehrenbacher L. et al. (2016) | Atezolizumab versus docetaxel for patients with previously treated non-small-cell lung cancer (POPLAR): a multicentre, open-label, phase 2 randomised controlled trial          |
| 11 | Wu D.-P. et al                | Phase II trial of gefitinib in female patients with                                                                                                                             |

|    |                                  |                                                                                                                                                                                                          |
|----|----------------------------------|----------------------------------------------------------------------------------------------------------------------------------------------------------------------------------------------------------|
|    | (2011)                           | previously treated advanced non-small cell lung cancer                                                                                                                                                   |
| 12 | Cheng H.-Y. et al<br>(2010)      | Clinical effect of continuous intravenous drip low- dose paclitaxel plus cisplatin treatment for advanced non-small- cell lung cancer                                                                    |
| 13 | Liang Y. et al<br>(2010)         | Randomized trial of weekly paclitaxel and cisplatin versus paclitaxel and cisplatin every three weeks in the treatment of elderly advanced NSCLC                                                         |
| 14 | Xiong Y. et al<br>(2010)         | Clinical analysis of efficacy in docetaxel plus cisplatin chemotherapy with 3-DCRT treating the patients with locally advanced NSCLC                                                                     |
| 15 | Liu C.-F. et al<br>(2018)        | Efficacy of Erlotinib in Post-Chemotherapy EGFR Wild-Type Lung Adenocarcinoma Patients                                                                                                                   |
| 16 | Xing PY et al<br>(2013)          | Efficacy and Safety of Albumin-bound Paclitaxel in Treating Recurrent Advanced Non-small Cell Lung Cancer                                                                                                |
| 17 | He Z.-R. et al<br>(2014)         | Study of Three-Dimensional Conformal Radiotherapy Combined with Concurrent Pemetrexed Chemotherapy and Erlotinib Maintenance in Treatment of Non-Squamous Cell Carcinoma of Locally Advanced Lung Cancer |
| 18 | Scagliotti G. V. et al<br>(2011) | Randomized Phase III Study of Surgery Alone or Surgery Plus Preoperative Cisplatin and Gemcitabine in Stages IB to IIIA Non–Small-Cell Lung Cancer                                                       |
| 19 | Mattson K.V. et al<br>(2003)     | Docetaxel as neoadjuvant therapy for radically treatable stage III non-small-cell lung cancer: a multinational randomized phase III study                                                                |
| 20 | Felip E. et al<br>(2010)         | Preoperative Chemotherapy Plus Surgery Versus Surgery Plus Adjuvant Chemotherapy Versus Surgery Alone in Early-Stage Non–Small-Cell Lung Cancer                                                          |
| 21 | Pisters K.M.W. et al<br>(2010)   | Surgery With or Without Preoperative Paclitaxel and Carboplatin in Early-Stage Non–Small-Cell Lung Cancer: Southwest Oncology Group Trial S9900, an Intergroup, Randomized, Phase III Trial              |
| 22 | Chang J.Y. et al<br>(2015)       | Stereotactic ablative radiotherapy versus lobectomy for operable stage I non-small-cell lung cancer: a pooled analysis of two randomised trials                                                          |
| 23 | Port J.L. et al<br>(2014)        | A Propensity-Matched Analysis of Wedge Resection and Stereotactic Body Radiotherapy for Early Stage Lung                                                                                                 |

|    |                             |                                                                                                                                                                                                                                             |
|----|-----------------------------|---------------------------------------------------------------------------------------------------------------------------------------------------------------------------------------------------------------------------------------------|
|    |                             | Cancer                                                                                                                                                                                                                                      |
| 24 | Berg LLVD et al (2015)      | Patterns of Recurrence and Survival after Surgery or Stereotactic Radiotherapy for Early Stage NSCLC                                                                                                                                        |
| 25 | Hamaji M. et al (2015)      | Video-Assisted Thoracoscopic Lobectomy Versus Stereotactic Radiotherapy for Stage I Lung Cancer                                                                                                                                             |
| 26 | Puri V. et al (2015)        | Treatment Outcomes in Stage I Lung Cancer <i>A Comparison of Surgery and Stereotactic Body Radiation Therapy</i>                                                                                                                            |
| 27 | Ready N. et al (2018)       | Third-Line Nivolumab Monotherapy in Recurrent SCLC: CheckMate 032                                                                                                                                                                           |
| 28 | Maemondo M et al (2010)     | Gefitinib or Chemotherapy for Non–Small-Cell Lung Cancer with Mutated EGFR                                                                                                                                                                  |
| 29 | Vyfhuis M.A.L. et al (2017) | Oncological outcomes from trimodality therapy receiving definitive doses of neoadjuvant chemoradiation ( $\geq 60$ Gy) and factors influencing consideration for surgery in stage III non-small cell lung cancer                            |
| 30 | Reck M. et al (2016)        | Pembrolizumab versus Chemotherapy for PD-L1–Positive Non–Small-Cell Lung Cancer                                                                                                                                                             |
| 31 | Kim Y.J. et al (2018)       | Efficacy and Safety of Afatinib for <i>EGFR</i> -mutant Non-small Cell Lung Cancer, Compared with Gefitinib or Erlotinib                                                                                                                    |
| 32 | Sun S. et al (2017)         | Exploratory cohort study and meta-analysis of <i>BIM</i> deletion polymorphism in patients with epidermal growth factor receptor-mutant non-small-cell lung cancer treated with epidermal growth factor receptor tyrosine kinase inhibitors |
| 33 | Herbst R.S. et al (2016)    | Pembrolizumab versus docetaxel for previously treated, PD-L1-positive, advanced non-small-cell lung cancer (KEYNOTE-010): a randomised controlled trial                                                                                     |
| 34 | Torigoe H. et al (2017)     | Induction chemoradiotherapy using docetaxel and cisplatin with definitive-dose radiation followed by surgery for locally advanced non-small cell lung cancer                                                                                |
| 35 | Yang J.J. et al (2017)      | A phase III randomised controlled trial of erlotinib vs gefitinib in advanced non-small cell lung cancer with EGFR mutations                                                                                                                |
| 36 | Sequist L.V. et al (2013)   | Phase III Study of Afatinib or Cisplatin Plus Pemetrexed in Patients with Metastatic Lung Adenocarcinoma with <i>EGFR</i> Mutations                                                                                                         |

|    |                           |                                                                                                                                                                                                                       |
|----|---------------------------|-----------------------------------------------------------------------------------------------------------------------------------------------------------------------------------------------------------------------|
| 37 | Zhou C.C. et al (2011)    | Erlotinib versus chemotherapy as first-line treatment for patients with advanced <i>EGFR</i> mutation-positive non-small-cell lung cancer (OPTIMAL, CTONG-0802): a multicentre, open-label, randomised, phase 3 study |
| 38 | Han J.-Y. et al (2012)    | First-SIGNAL: First-Line Single-Agent Iressa Versus Gemcitabine and Cisplatin Trial in Never-Smokers With Adenocarcinoma of the Lung                                                                                  |
| 39 | Mok T. S. et al (2009)    | Gefitinib or Carboplatin–Paclitaxel in Pulmonary Adenocarcinoma                                                                                                                                                       |
| 40 | Karim N. A. et al (2014)  | Phase II Clinical Trial of Gefitinib for the Treatment of Chemonaïve Patients with Advanced Non-small Cell Lung Cancer with Poor Performance Status                                                                   |
| 41 | Ma L. et al (2017)        | Survival and prognostic factors of non-small cell lung cancer patients with postoperative locoregional recurrence treated with radical radiotherapy                                                                   |
| 42 | Shiroyama T. et al (2017) | Pretreatment advanced lung cancer inflammation index (ALI) for predicting early progression in nivolumab-treated patients with advanced non–small cell lung cancer                                                    |
| 43 | Blackhall F. et al (2017) | Final results of the large-scale multinational trial PROFILE 1005: efficacy and safety of crizotinib in previously treated patients with advanced/metastatic ALK-positive nonsmall-cell lung cancer                   |
| 44 | Lin Y.-T. et al (2018)    | Real-World Crizotinib Use for Anaplastic Lymphoma Kinase (ALK)-Positive Advanced Non-Small Cell Lung Cancer under First-Year National Health Insurance Coverage in Taiwan                                             |
| 45 | Peters S. et al (2017)    | Phase II Trial of Atezolizumab As First-Line or Subsequent Therapy for Patients With Programmed Death-Ligand 1–Selected Advanced Non–Small-Cell Lung Cancer (BIRCH)                                                   |
| 46 | Gandhi L. et al (2018)    | Pembrolizumab plus Chemotherapy in Metastatic Non–Small-Cell Lung Cancer                                                                                                                                              |
| 47 | Antonia S.J. et al (2017) | Durvalumab after Chemoradiotherapy in Stage III Non–Small-Cell Lung Cancer                                                                                                                                            |
| 48 | Senan S. et al (2016)     | PROCLAIM: Randomized Phase III Trial of Pemetrexed-Cisplatin or Etoposide-Cisplatin Plus Thoracic Radiation Therapy Followed by Consolidation                                                                         |

|    |                              |                                                                                                                                                                                                                                                     |
|----|------------------------------|-----------------------------------------------------------------------------------------------------------------------------------------------------------------------------------------------------------------------------------------------------|
|    |                              | Chemotherapy in Locally Advanced Nonsquamous Non–Small-Cell Lung Cancer                                                                                                                                                                             |
| 49 | Santiesteban E. et al (2014) | Safety and Efficacy of Racotumomab-Alum Vaccine as Second-Line Therapy for Advanced Non-Small Cell Lung Cancer                                                                                                                                      |
| 50 | Alfonso S. et al (2014)      | A Randomized, Multicenter, Placebo-Controlled Clinical Trial of Racotumomab-Alum Vaccine as Switch Maintenance Therapy in Advanced Non–Small Cell Lung Cancer Patients                                                                              |
| 51 | Sum Y. et al (2013)          | Long-term results of a randomized, double-blind, and placebo-controlled phase III trial: Endostar (rh-endostatin) versus placebo in combination with vinorelbine and cisplatin in advanced non-small cell lung cancer                               |
| 52 | Guo J.-C. et al (2018)       | Efficacy and safety of Endostar combined with vinorelbine and cisplatin for the treatment of advanced non-small cell lung cancer: a comparative study                                                                                               |
| 53 | Zhou S.Y. et al (2018)       | Efficacy and safety of rh-endostatin (Endostar) combined with pemetrexed/cisplatin followed by rh-endostatin plus pemetrexed maintenance in non-small cell lung cancer: A retrospective comparison with standard chemotherapy                       |
| 54 | Nakajima K. et al (2018)     | Clinical outcomes of image-guided proton therapy for histologically confirmed stage I non-small cell lung cancer                                                                                                                                    |
| 55 | Lesueur P. et al (2018)      | Safety of combined PD-1 pathway inhibition and radiation therapy for non-small-cell lung cancer: A multicentric retrospective study from the GFPC                                                                                                   |
| 56 | Ross H.J. et al (2006)       | A randomized, multicenter study to determine the safety and efficacy of the immunoconjugate SGN-15 plus docetaxel for the treatment of non-small cell lung carcinoma                                                                                |
| 57 | Garassino M. C. et al (2013) | lung cancer: A multicentric retrospective study from the GFPC<br>Erlotinib versus docetaxel as second-line treatment of patients with advanced non-small-cell lung cancer and wild-type <i>EGFR</i> tumours (TAILOR): a randomised controlled trial |
| 58 | Hanna N. et al               | Randomized Phase III Trial of Pemetrexed Versus                                                                                                                                                                                                     |

|    |                             |                                                                                                                                                                                             |
|----|-----------------------------|---------------------------------------------------------------------------------------------------------------------------------------------------------------------------------------------|
|    | (2004)                      | Docetaxel in Patients With Non–Small-Cell Lung Cancer Previously Treated With Chemotherapy                                                                                                  |
| 59 | Ksienski D. et al (2018)    | Efficacy of Nivolumab and Pembrolizumab in Patients with Advanced Non-Small-Cell Lung Cancer Needing Treatment Interruption Because of Adverse Events: A Retrospective Multicenter Analysis |
| 60 | Karampeazis A. et al (2013) | Pemetrexed versus Erlotinib in Pretreated Patients with Advanced Non–Small Cell Lung Cancer: A Hellenic Oncology Research Group (HORG) Randomized Phase 3 Study                             |
| 61 | Zhang Z.-Q. et al (2016)    | Effects of DC,CIK Combined with Conventional Chemotherapy on Prolonging Survival, Improving Quality of Life of Patients with Advanced NSCLC                                                 |
| 62 | Fu J.-P. et al (2016)       | Evaluation of efficiency of induction and consolidation chemotherapy for stage III NSCLC                                                                                                    |
| 63 | Sun Y.L. et al (2016)       | Efficacy and Safety of Pemetrexed First-line Continued Consolidation in Pemetrexed/Carboplatin Chemotherapy for Elderly Patients with Advanced NSCLC                                        |
| 64 | Lyu J.H. et al (2015)       | A Prospective Phase II Study of Consolidation Chemotherapy after Concurrent Chemoradiotherapy for Oligometastatic Stage IV Non-small Cell Lung Cancer                                       |
| 65 | Zhao Y.N. et al (2017)      | Efficacy and Safety of Lobaplatin Plus Vinorelbine in Postoperative Adjuvant, Chemotherapy for Patients with NSCLC                                                                          |
| 66 | Gong Z. et al (2017)        | Aiyu Capsules or Fufang Banmao Capsules combined with icotinib hydrochloride in the treatment of advanced NSCLC                                                                             |
| 67 | Zhou Y. (2017)              | Observation of clinical efficacy and its influence on quality of life of pemetrexed combined with nadaplatin for advanced NSCLC                                                             |
| 68 | Qi Y.-J. (2012)             | Effect of Shenqi Fuzheng Injection Oil The Quality of Life in Patients with Lung Cancer Receiving Chemotherapy after Undergoing Surgery                                                     |
| 69 | Zhou C.-H. et al (2008)     | Clinical evaluation of Shenqi Fuzheng injection in the chemo-radiotherapy in treatment of non-small-cell lung cancer                                                                        |
| 70 | Wang Y.-X. et al (2009)     | Shenqi Fuzheng injection combined with three dimensional-conformal radiotherapy for old patient's                                                                                           |

|    |                                   |                                                                                                                                                                                                                              |
|----|-----------------------------------|------------------------------------------------------------------------------------------------------------------------------------------------------------------------------------------------------------------------------|
|    |                                   | advanced non-small cell lung cancer                                                                                                                                                                                          |
| 71 | Liu C.-L. et al (2004)            | Effect of Shenqi Fuzheng Injection for Assistance of Chemotherapy in Treating Senile patients with Non-small Cell Lung Cancer                                                                                                |
| 72 | Li Q. et al (2017)                | Effects of Shenqi Fuzheng injection combined with chemotherapy on immune function and tumor markers in elderly patients with non-small cell lung cancer                                                                      |
| 73 | Wang W.-M. et al (2011)           | The treatment of Shenqifuzheng injection combined with docetaxel and cisplatin for advanced lung cancer                                                                                                                      |
| 74 | Wang Y.Q. et al (2010)            | Clinical Observation of Shenqi Fuzheng Injection Combined with Chemotherapy in the Treatment of Advanced Lung Cancer                                                                                                         |
| 75 | Wang L.Y. et al (2009)            | Clinical Observation of Shenqi Fuzheng Injection Combined with Chemotherapy in the Treatment of Advanced Non-small Cell Lung Cancer                                                                                          |
| 76 | Basu S. et al (2006)              | A prospective and randomized study of radiotherapy, sequential chemotherapy radiotherapy and concomitant chemotherapy-radiotherapy in unresectable non small cell carcinoma of the lung                                      |
| 77 | Atagi S. et al (2005)             | Standard Thoracic Radiotherapy with or without Concurrent Daily Low-dose Carboplatin in Elderly Patients with Locally Advanced Non-small Cell Lung Cancer: a Phase III Trial of the Japan Clinical Oncology Group (JCOG9812) |
| 78 | Huber R.M. et al (2006)           | Simultaneous Chemoradiotherapy Compared With Radiotherapy Alone After Induction Chemotherapy in Inoperable Stage IIIA or IIIB Non-Small-Cell Lung Cancer: Study CTRT99/97 by the Bronchial Carcinoma Therapy Group           |
| 79 | Winton T. et al (2016)            | Vinorelbine plus Cisplatin vs. Observation in Resected Non-Small-Cell Lung Cancer                                                                                                                                            |
| 80 | Arriagada R. et al (2004)         | The International Adjuvant Lung Cancer Trial Collaborative Group. Cisplatin-Based Adjuvant Chemotherapy in Patients with Completely Resected Non-Small-Cell Lung Cancer                                                      |
| 81 | Rodrigues-Pereira J. et al (2011) | A Randomized Phase 3 Trial Comparing Pemetrexed/Carboplatin and Docetaxel/Carboplatin as First-Line Treatment for Advanced, Nonsquamous Non-                                                                                 |

|    |                                 |                                                                                                                                                                                                              |
|----|---------------------------------|--------------------------------------------------------------------------------------------------------------------------------------------------------------------------------------------------------------|
|    |                                 | small Cell Lung Cancer                                                                                                                                                                                       |
| 82 | Nawrocki S. et al (2010)        | Concurrent Chemotherapy and Short Course Radiotherapy in Patients with Stage IIIA to IIIB Non-small Cell Lung Cancer Not Eligible for Radical Treatment <i>Results of a Randomized Phase II Study</i>        |
| 83 | Scagliotti G.V. et al (2013)    | An Open-Label, Multicenter, Randomized, Phase II Study of Pazopanib in Combination with Pemetrexed in First-Line Treatment of Patients with Advanced-Stage Non-Small-Cell Lung Cancer                        |
| 84 | Ferry D. et al (2017)           | Carboplatin versus two doses of cisplatin in combination with gemcitabine in the treatment of advanced non-small-cell lung cancer: Results from a British Thoracic Oncology Group randomised phase III trial |
| 85 | Tanaka K. et al (2015)          | <i>EGFR</i> Mutation Impact on Definitive Concurrent Chemoradiation Therapy for Inoperable Stage III Adenocarcinoma                                                                                          |
| 86 | Chiappori A. et al (2010)       | Phase II, Double-Blinded, Randomized Study of Enzastaurin Plus Pemetrexed as Second-Line Therapy in Patients with Advanced Non-small Cell Lung Cancer                                                        |
| 87 | Clement-Duchene C. et al (2012) | A phase II study of enzastaurin in combination with erlotinib in patients with previously treated advanced non-small cell lung cancer                                                                        |
| 88 | Foster C.C. et al (2019)        | Adjuvant chemotherapy following stereotactic body radiotherapy for early stage non-small-cell lung cancer is associated with lower overall: A National Cancer Database Analysis                              |
| 89 | Perng R.-P. et al (1997)        | Gemcitabine Versus the Combination of Cisplatin and Etoposide in Patients with Inoperable Non-Small-Cell Lung Cancer in a Phase II Randomized Study                                                          |
| 90 | Manegold C. et al (1997)        | Single-agent gemcitabine <i>versus</i> cisplatin-etoposide: Early results of a randomised phase II study in locally advanced or metastatic non-small-cell lung cancer                                        |
| 91 | Sandler A. et al (1999)         | Gemcitabine: Single-Agent and Combination Therapy in Non-Small Cell Lung Cancer                                                                                                                              |
| 92 | Le Chevalier P et al (1994)     | Randomized study of vinorelbine and cisplatin versus vindesine and cisplatin versus vinorelbine alone in advanced non-small-cell lung cancer: results of a European multicenter trial including 612 patients |



|     |                                  |                                                                                                                                                                                                                     |
|-----|----------------------------------|---------------------------------------------------------------------------------------------------------------------------------------------------------------------------------------------------------------------|
| 93  | Laack E. et al<br>(2004)         | Randomized Phase III Study of Gemcitabine and Vinorelbine Versus Gemcitabine, Vinorelbine, and Cisplatin in the Treatment of Advanced Non–Small-Cell Lung Cancer: From the German and Swiss Lung Cancer Study Group |
| 94  | Zhang Q.Q. et al<br>(2015)       | Comparison of single-agent chemotherapy and targeted therapy to first-line treatment in patients aged 80 years and older with advanced non-small-cell lung cancer                                                   |
| 95  | Cardenal F. et al<br>(1999)      | Randomized Phase III Study of Gemcitabine-Cisplatin Versus Etoposide-Cisplatin in the Treatment of Locally Advanced or Metastatic Non–Small-Cell Lung Cancer                                                        |
| 96  | Stinchcombe T.E. et al<br>(2019) | Effect of Erlotinib Plus Bevacizumab vs Erlotinib Alone on Progression-Free Survival in Patients with Advanced <i>EGFR</i> -Mutant Non–Small Cell Lung Cancer A Phase 2 Randomized Clinical Trial                   |
| 97  | Puri V. et al<br>(2012)          | A comparison of surgical intervention and stereotactic body radiation therapy for stage I lung cancer in high-risk patients: A decision analysis                                                                    |
| 98  | Wang P. et al<br>(2016)          | A propensity-matched analysis of surgery and stereotactic body radiotherapy for early stage non-small cell lung cancer in the elderly                                                                               |
| 99  | Kastelijn E.A. et al<br>(2015)   | Clinical Outcomes in Early-stage NSCLC Treated with Stereotactic Body Radiotherapy <i>Versus</i> Surgical Resection                                                                                                 |
| 100 | Sakaguchi M. et al<br>(2016)     | Patient outcomes of monotherapy with hypofractionated three-dimensional conformal radiation therapy for stage T2 or T3 non-small cell lung cancer: a retrospective study                                            |
| 101 | Crabtree T.D. et al<br>(2013)    | Analysis of first recurrence and survival in patients with stage I non–small cell lung cancer treated with surgical resection or stereotactic radiation therapy                                                     |
| 102 | Verstegen N.E. et al<br>(2013)   | Stage I–II non-small-cell lung cancer treated using either stereotactic ablative radiotherapy (SABR) or lobectomy by video-assisted thoracoscopic surgery (VATS): outcomes of a propensity score-matched analysis   |
| 103 | Stephans K.L. et al<br>(2009)    | A Comparison of Two Stereotactic Body Radiation Fractionation Schedules for Medically Inoperable Stage I Non-small Cell Lung Cancer <i>The Cleveland Clinic</i>                                                     |

|     |                              |                                                                                                                                                                                                              |
|-----|------------------------------|--------------------------------------------------------------------------------------------------------------------------------------------------------------------------------------------------------------|
|     |                              | <i>Experience</i>                                                                                                                                                                                            |
| 104 | Crabtree T. D. et al (2010)  | Stereotactic body radiation therapy versus surgical resection for stage I non–small cell lung cancer                                                                                                         |
| 105 | Grills I.S. et al (2010)     | Outcomes After Stereotactic Lung Radiotherapy or Wedge Resection for Stage I Non–Small-Cell Lung Cancer                                                                                                      |
| 106 | Palma D. et al (2011)        | Treatment of stage I NSCLC in elderly patients: A population-based matched-pair comparison of stereotactic radiotherapy versus surgery                                                                       |
| 107 | Varlotto J. et al (2013)     | Matched-Pair and Propensity Score Comparisons of Outcomes of Patients with Clinical Stage I Non–Small Cell Lung Cancer Treated with Resection or Stereotactic Radiosurgery                                   |
| 108 | Robinson C.G. et al (2013)   | Patterns of Failure after Stereotactic Body Radiation Therapy or Lobar Resection for Clinical Stage I Non–Small-Cell Lung Cancer                                                                             |
| 109 | Hamaji M. et al (2015)       | Video-Assisted Thoracoscopic Lobectomy Versus Stereotactic Radiotherapy for Stage I Lung Cancer                                                                                                              |
| 110 | Ren B.C. et al (2015)        | Clinical effect study of chemical therapy combined with Endostar treatment on late stage NSCLC patients with the expression of ERCC 1                                                                        |
| 111 | Zhao Z.-Y. et al (2007)      | The short-term observation of Shenqi Fuzheng injection combined with NP chemotherapy in treating elderly patients with advanced non-small cell lung cancer                                                   |
| 112 | Shi X. et al (2007)          | Combined treatment of Shenqi Fuzheng injection and chemotherapy on advanced NSCLC                                                                                                                            |
| 113 | Wang S.J. (2009)             | Clinical Observation of Shenqi Fuzheng Injection Combined with Chemotherapy in the Treatment of 74 Cases of Senile Small Cell Lung Cancer                                                                    |
| 114 | Wang J.W. et al (2005)       | Results of randomized, multicenter, double-blind phase III trial of rh-endostatin(YH-16) in treatment of advanced non-small cell lung cancer patients                                                        |
| 115 | Le Chevalier T. et al (1994) | Randomized Study of Vinorelbine and Cisplatin Versus Vindesine and Cisplatin Versus Vinorelbine Alone in Advanced Non-Small-Cell Lung Cancer: Results of a European Multicenter Trial Including 612 Patients |
